# Supplementary material for: Promising Outcomes of Modified ALPPS for Staged Hepatectomy in Cholangiocarcinoma
Source: MDPI journal article supplement (doi:10.3390/cancers15235613), 2023-11-28

**Promising outcomes of modified associating liver partition and portal vein  
ligation for staged hepatectomy in cholangiocarcinoma  
(Supplementary materials)**

**Figure S1.** Three-year recurrence-free survival of patients who underwent ALPPS for PHCC.

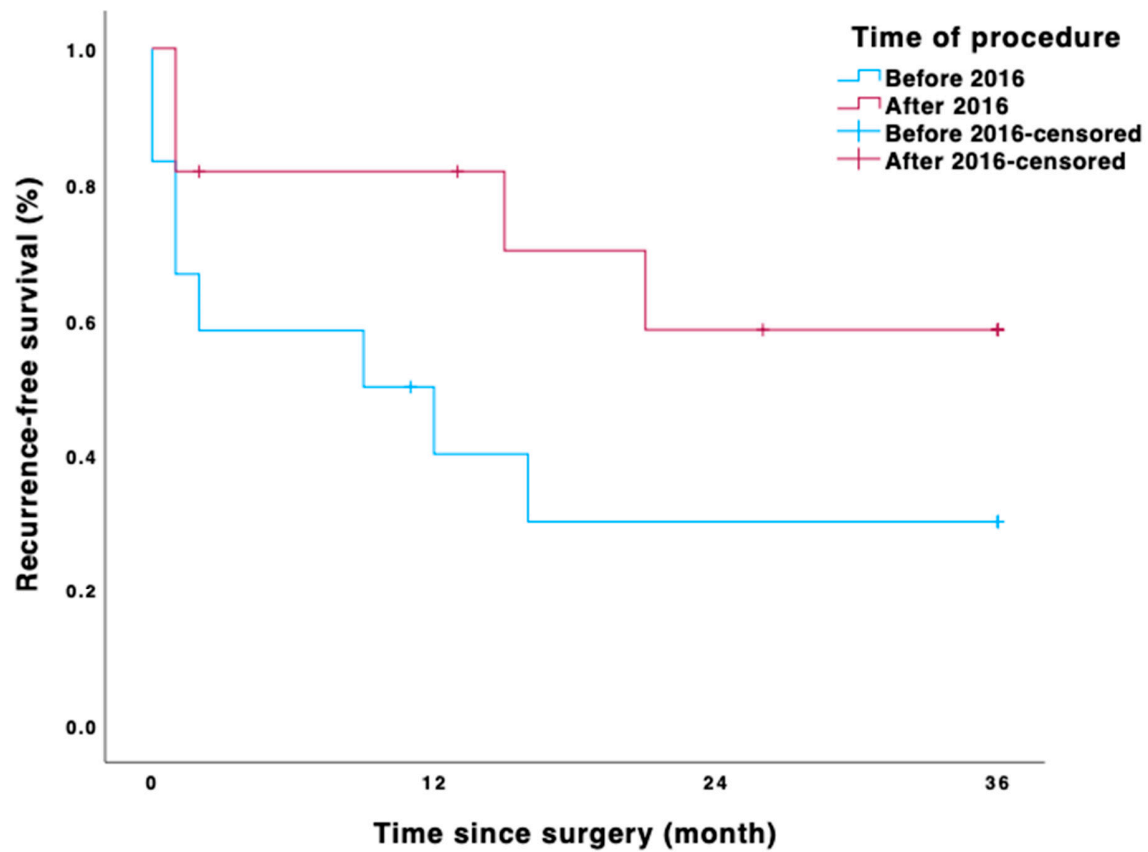

**Figure S2.** Three-year overall survival of patients who underwent ALPPS for PHCC.

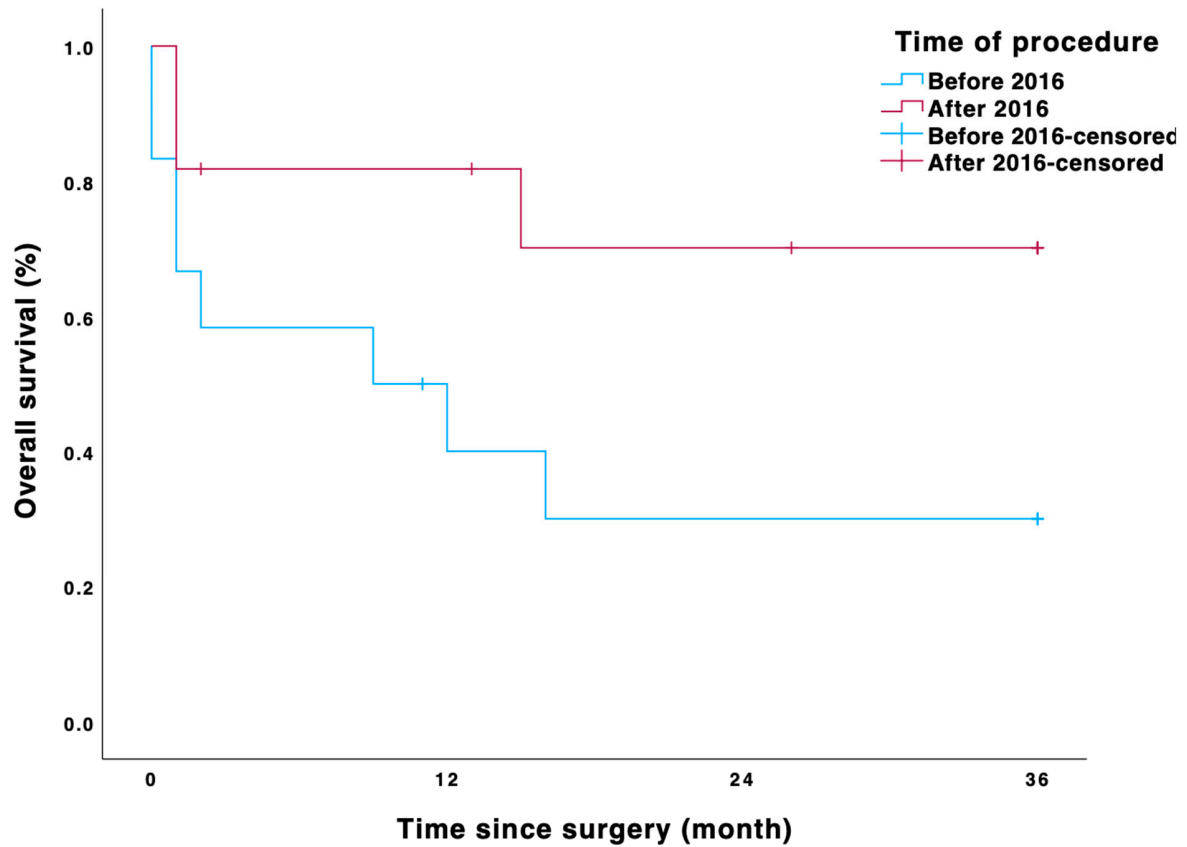

Supplement: s1 [file s1]
